# Supplementary material for: Transportation of silver nanopaticles in nanochannels of carbon nanotubes with supercritical waterElectronic supplementary information (ESI) available: Fig. S1. Ag nanoparticle drawn into MWNTs showing characteristic lattice fringes. See http://www.rsc.org/suppdata/cc/b3/b306540e/
Source: Royal Society of Chemistry journal article supplement (doi:10.1039/b306540e), 2003-01-01
Supplement: b306540e.doc [file b306540e.doc]

**Supporting Information**

**Transportation of Silver Nanoparticles in Nanochannels of Carbon Nanotubes with Supercritical Water**

Jia-Yaw Chang, Fu-Der Mai, Bertrand Lo, Jia-Jiu Chang, Shin-Hwa Tzing, Anil Ghule and Yong-Chien Ling*

**Figure S1.** (a) Transmission electron microscope image of the Ag nanoparticle encapsulated in the MWNTs, (b) High resolution image of the encapsulated section, and (c) Lattice fringes observed, characteristic of crystalline Ag nanoparticle. (SCW condition 27.5 MPa, 450 °C, and 20 min).


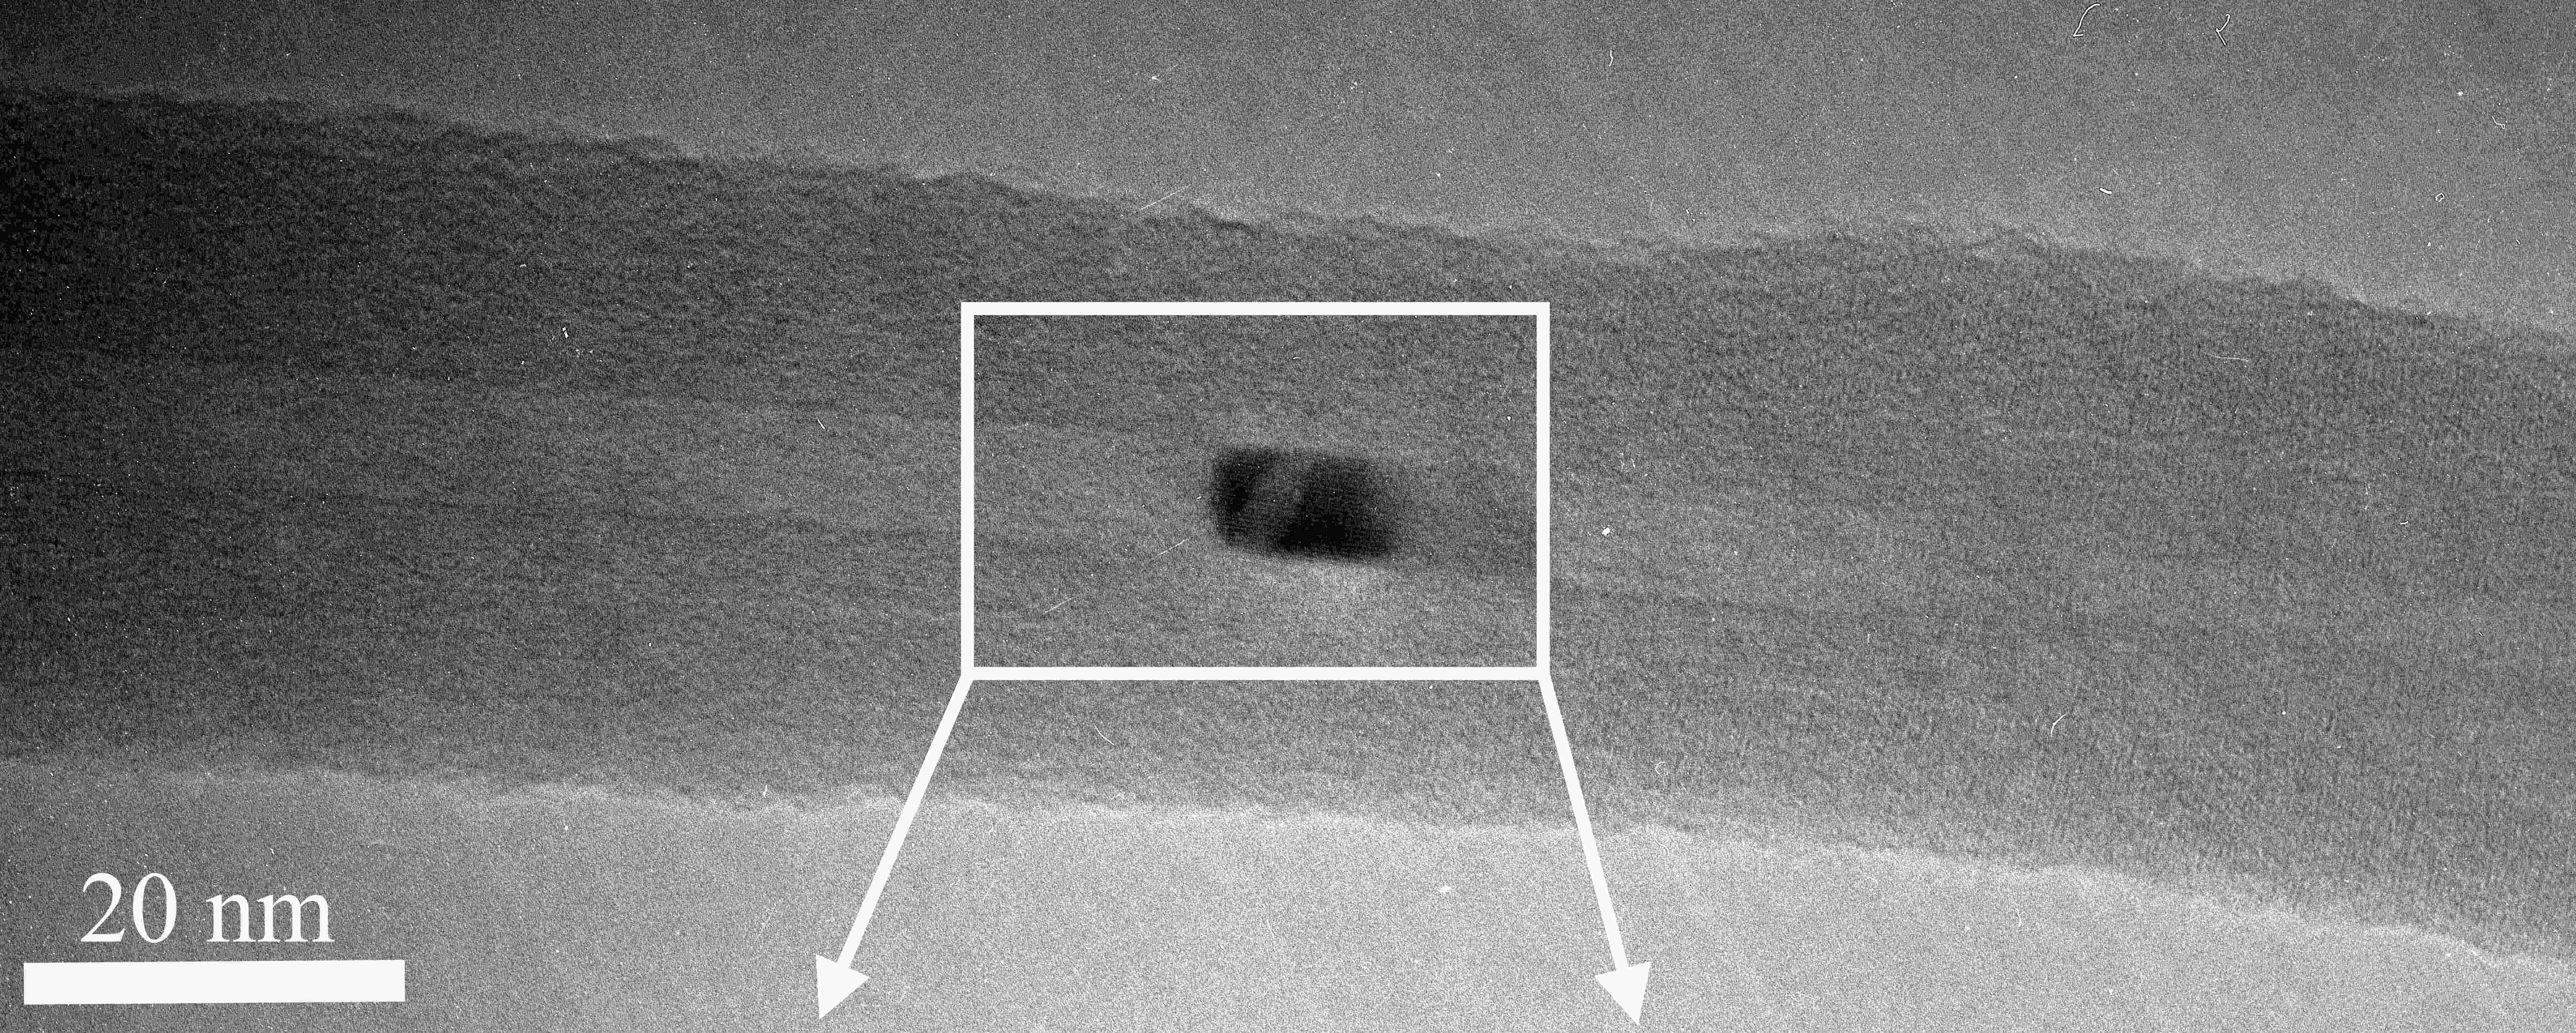

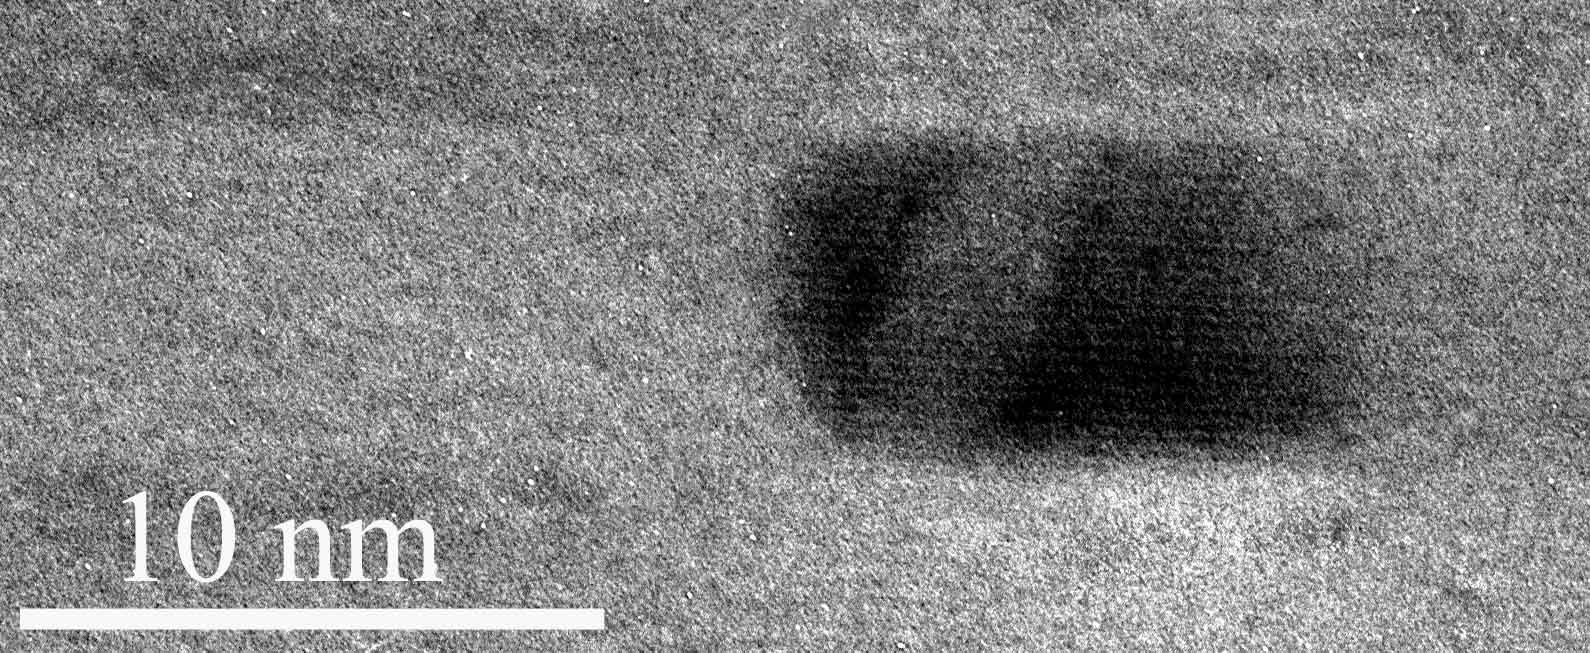

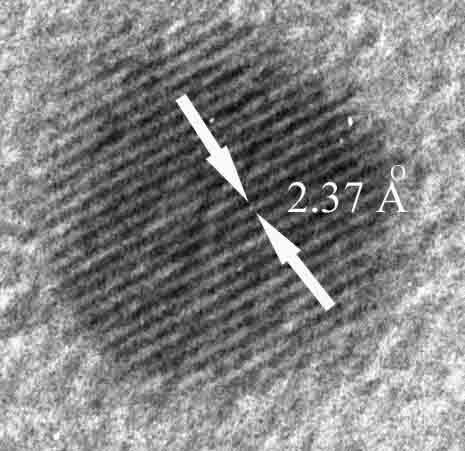


(a)

(b)

(c)
